# Supplementary material
Source: MDPI journal article supplement (doi:10.3390/chemosensors14030076)
Supplement: s1 [file chemosensors-4154678-supplementary.pdf › chemosensors-4154678-supplementary.pdf]

## Supplementary Information

Article

# A Novel Electrochemiluminescent Biosensor Based on Nitrogen-Doped Graphyne for Ultrasensitive Kanamycin Residues Detection in Milk and Honey Sample

Yuxuan Liu <sup>1</sup>, Tianzeng Huang <sup>2</sup>, Yang Chen <sup>3</sup>, Gaowa Xing <sup>3,\*</sup>, Hongmei Cao <sup>1,\*</sup> and Daixin Ye <sup>4,\*</sup>

<sup>1</sup> School of Food Science and Engineering, Hainan University, Haikou 570228, China; [23220951350052@hainanu.edu.cn](mailto:23220951350052@hainanu.edu.cn); hmcao@hainanu.edu.cn (H.C.).

<sup>2</sup> School of Chemistry and Chemical Engineering, Hainan University, Haikou 570228, China; huangtianzeng505@163.com

<sup>3</sup> Fujian Provincial Key Laboratory of Ecological Impacts and Treatment Technologies for Emerging Contaminants, College of Environmental & Biological Engineering, Putian University, Putian 351100, China; [chenyang@stu.ptu.edu.cn](mailto:chenyang@stu.ptu.edu.cn)

<sup>4</sup> Institute for Sustainable Energy, Materials Science and Engineering, College of Sciences, Shanghai University, Shanghai 200444, China. daixinye@shu.edu.cn

\* Correspondence: gwxing@ptu.edu.cn (G.X.); hmcao@hainanu.edu.cn (H.C.); daixinye@shu.edu.cn (D.Y.)

\

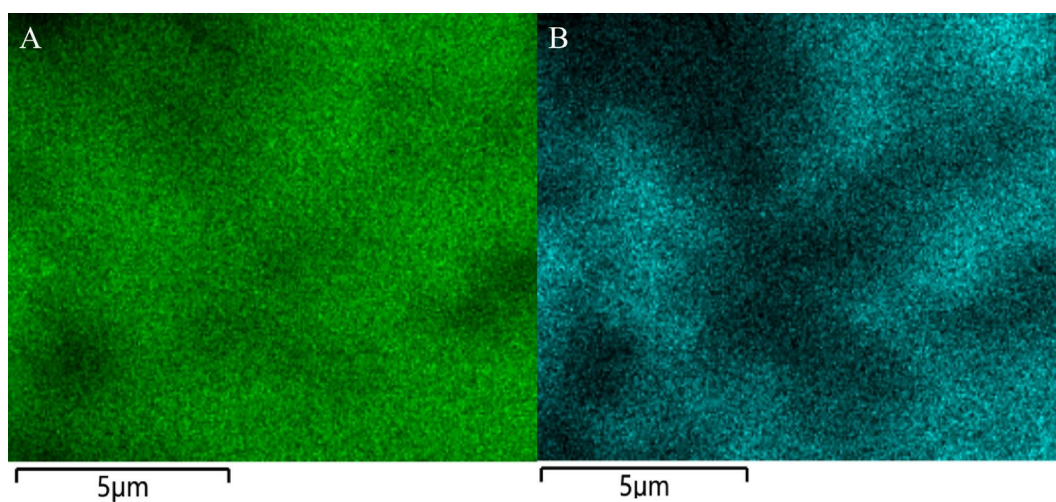

**Fig. S1.** The corresponding EDS elemental mapping images of Si and O (A, B).

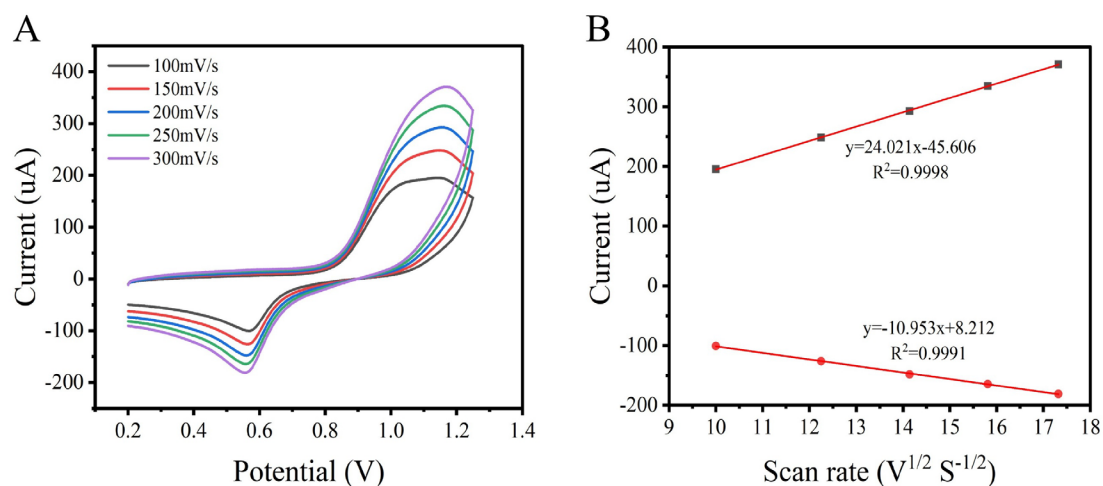

**Fig. S2.** (A) CV curves of KAN/mSiO<sub>2</sub>@Nafion@Ru(bpy)<sub>3</sub><sup>2+</sup>-Apt DNA/BSA/cDNA/Au/1N-GY/GCE at different scan rates (100-300 mV s<sup>-1</sup>); (B) A linear relationship between the square root of the scan rate and the current density.

**able S1.** Comparison with other detection methods of KAN.

| Methods                  | Linear range         | Detection limit | References |
|--------------------------|----------------------|-----------------|------------|
| FRET                     | 1.0 nM – 80.0 nM     | 0.29 nM         | [1]        |
| colorimetric             | 0.01 nM – 500 nM     | 9 pM            | [2]        |
| Photoelectrochemical     | 0.1 nM – 500 nM      | 0.02 nM         | [3]        |
| photoelectrochemical     | 0.2 nM – 450 nM      | 0.05 nM         | [4]        |
| Fluorescence             | 100 nM – 1.1 $\mu$ M | 22.6 nM         | [5]        |
| Electrochemiluminescence | 1.0 pM – 1.0 $\mu$ M | 1.08 pM         | This work  |

## References

1. Deng, J.; Liu, Y.; Lin, X.; Lyu, Y.; Qian, P.; Wang, S. A Ratiometric Fluorescent Biosensor Based on Cascaded Amplification Strategy for Ultrasensitive Detection of Kanamycin. *Sens. Actuators. B* **2018**, *273*, 1495-1500. doi:<https://doi.org/10.1016/j.snb.2018.07.065>
2. Zhao, T.; Chen, Q.; Wen, Y.; Bian, X.; Tao, Q.; Liu, G.; Yan, J. A Competitive Colorimetric Aptasensor for Simple and Sensitive Detection of Kanamycin Based on Terminal Deoxynucleotidyl Transferase-Mediated Signal Amplification Strategy. *Food Chem.* **2022**, *377*, 132072. doi:<https://doi.org/10.1016/j.foodchem.2022.132072>
3. Zhang, C.; Zhou, L.; Peng, J. Blue-Light Photoelectrochemical Aptasensor for Kanamycin Based on Synergistic Strategy by Schottky Junction and Sensitization. *Sens. Actuators. B* **2021**, *340*, 129898. doi:<https://doi.org/10.1016/j.snb.2021.129898>
4. Liu, X.; Liu, P.; Tang, Y.; Yang, L.; Li, L.; Qi, Z.; Li, D.; Wong, D.K.Y. A Photoelectrochemical Aptasensor Based on a 3D Flower-Like TiO<sub>2</sub>-MoS<sub>2</sub>-Gold Nanoparticle Heterostructure for Detection of Kanamycin. *Biosens. Bioelectron.* **2018**, *112*, 193-201. doi:<https://doi.org/10.1016/j.bios.2018.04.041>
5. Wang, X.; Zhang, W.; Gao, X.; Sun, Z.; Sun, X.; Guo, Y.; Li, F.; Boboriko, N.E. Fluorescent Aptasensor Based on DNA-AgNCs Emitting in the Visible Red Wavelength Range for Detection of Kanamycin in Milk. *Sens. Actuators. B* **2022**, *360*, 131665. doi:<https://doi.org/10.1016/j.snb.2022.131665>
